# Supplementary material for: In-Situ Estimates of Net Ecosystem Metabolisms in the Rocky Habitats of Dokdo Islets in the East Sea of Korea
Source: MDPI journal article supplement (doi:10.3390/jmse10070887), 2022-06-27
Supplement: s1 [file s1]

**Table S1.** AEC measurement times and site characteristics of kelp bed (KB) and bare rocky bottom (BR) habitats (locations, water depth, bottom water salinity and temperature, photosynthetically active radiation [PAR], mean flow velocity [ $\bar{U}$ ], and dissolved oxygen [ $O_2$ ]). The parenthesized values of  $O_2$  are the daily mean and standard error.

|    | AEC measurement time<br>(Local dates and times) | Location   | Depth<br>(m) | Salinity    | Temperature<br>(°C) | PAR<br>( $\mu\text{mol m}^{-2} \text{s}^{-1}$ ) | $\bar{U}$<br>( $\text{cm s}^{-1}$ ) | $O_2$<br>( $\mu\text{mol L}^{-1}$ ) |
|----|-------------------------------------------------|------------|--------------|-------------|---------------------|-------------------------------------------------|-------------------------------------|-------------------------------------|
| KB | 10/10/2019 07:30 – 10/11/2019 08:10             | 37.2432 N  | 5.1          | 33.82–34.26 | 18.83–19.63         | < 493                                           | 4.8–38.4                            | 259–303                             |
|    |                                                 | 131.8645 E |              |             |                     | (74)                                            | (8.8)                               | (276 $\pm$ 0.5)                     |
| BR | 10/10/2019 07:30 – 10/11/2019 08:03             | 37.2440 N  | 8.4          | (34.02)     | (19.20)             | < 399                                           | 2.4–16.5                            | 196–261                             |
|    |                                                 | 131.8639 E |              |             |                     | (67)                                            | (3.6)                               | (226 $\pm$ 0.4)                     |
